# Supplementary material for: N-glycolylneuraminic acid serum biomarker levels are elevated in breast cancer patients at all stages of disease
Source: bioRxiv or medRxiv preprint supplement (doi:10.1101/2021.06.21.449179), 2021-08-03

717 **Supplementary Information**

718

719 **Supplementary Methods**

720 *Development of Glycoprotein Units (GPUs) standard curve for normalization*  
721 *of data from the SubB2M-A12-SPR assays*

722 To generate an internal calibration curve, the Neu5Gc-containing  
723 glycoproteins bovine Alpha-1-acid glycoprotein (bAGP) (Sigma-Aldrich, Cat  
724 No. G3643) and human cancer antigen 125 (CA125) purified from a human  
725 ovarian carcinoma cell line (MyBioSource, San Diego, USA, Cat No.  
726 MBS318371) were combined at starting concentrations of 15 µg/ml and 15  
727 units/ml, respectively, in 0.5 % normal human serum (equivalent to 3000  
728 µg/ml bAGP and 3000 units/ml CA125 in 100 % serum). This glycoprotein  
729 mixture was two-fold serially diluted down to 14.65 ng/ml and 0.0146515  
730 units/ml, respectively, in 0.5 % normal human serum. This concentration  
731 range of glycoprotein standards was run before every set of serum samples  
732 analyzed. RUs for each concentration of the GPU standard mixture were  
733 determined by subtracting binding due to SubB<sub>A12</sub> (flow cell 4) from binding  
734 due to SubB2M on flow cell 2 and flow cell 3. The RUs obtained for the  
735 highest concentration standard was considered 100 GPUs. The resulting  
736 standard curve was used to convert SPR RUs, taken at the point of stability in  
737 the generated sensorgram, to GPUs. The presence of Neu5Gc on both  
738 standard glycoproteins was confirmed by mass spectrometry as described  
739 previously (17) and below.

740

741

742 *Mass spectrometry glycomic analysis of standard glycoproteins*

743 Glycoproteins (10 µg bAGP and 116.83 units CA125) were immobilised onto  
744 PVDF membrane (Millipore) and *N*-glycans released by overnight incubation  
745 with 0.5 µl PNGase F (New England BioLabs 500,000 units/ml) in 10 µl water  
746 at 37 °C. Released *N*-glycans were reduced to alditols with 0.5 M NaBH<sub>4</sub> in  
747 50 mM KOH for 3 h at 50 °C. The reduction was quenched with 1 µl glacial  
748 acetic acid desalted using AG50W-X8 cation exchange resin.

749 *O*-glycans were released from PNGase F treated proteins by reductive β-  
750 elimination. PVDF spots were incubated in 20 µL of 0.5 M NaBH<sub>4</sub> in 50 mM  
751 KOH at 50 °C for 16 hours and desalted as described for the *N*-glycans.

752 PGC-LC-ESI-MS *N*-glycans were analysed using a Hypercarb PGC column (3  
753 µm, 100 mm × 180 µm, Thermo Scientific). *N*-glycans were separated over a  
754 90 min and *O*-glycans over a 60 min gradient of 1–90 % of acetonitrile in 10  
755 mM ammonium bicarbonate (vol/vol) at a flow rate of 1 µL/min using a Dionex  
756 ultimate HPLC (Thermo Scientific) interfaced with an amaZon Speed ESI-IT  
757 mass spectrometer (Bruker Bruker Daltonics, Germany).

758 The MS spectra were acquired in negative ion mode over a mass range of  
759 450 to 2200 m/z. The following MS settings were used: drying gas  
760 temperature: 180 °C, drying gas flow: 5 L/min, nebulizer gas: 9 psi, capillary  
761 3400 V. Ions were detected in ion charge control (ICC) (target: 50,000 ions)  
762 with an accumulation time of 200 ms. Induced collision was performed at 35  
763 % normalised collision energy and an isolation window of 4 m/z). Instrument  
764 control, data acquisition and processing were performed with Bruker  
765 DataAnalysis software version 4.2 (Bruker Daltonics, Germany).

766

767 **Supplementary Figures**

768 **Figure S1. Glycan array analysis of SubB2M and SubB<sub>A12</sub> using a Z-**  
769 **Biotech Neu5Ac/Neu5Gc array. A)** Glycan array result of SubB2M and  
770 SubB<sub>A12</sub> performed using the Z-Biotech Neu5Gc/Neu5Ac N-Glycan Array.  
771 Histogram represents the average relative fluorescent units of binding to each  
772 of the numbered structures shown in **B**. For structure ID see  
773 <http://www.zbiotech.com/neu5gc-xenoantigen-microarray.html> and  
774 <http://nebula.wsimg.com/deda6829116ce09edb871bd7ce7cde6c?AccessKeyI>  
775 [d=B5CD53DB37409833427C&disposition=0&alloworigin=1](http://nebula.wsimg.com/deda6829116ce09edb871bd7ce7cde6c?AccessKeyId=B5CD53DB37409833427C&disposition=0&alloworigin=1) for further  
776 information.

777  
778 **Figure S2. Characterization of human CA125 O-glycosylation and bovine**  
779 **Alpha-1-acid glycoprotein (bAGP) by PGC-LC-MS/MS.** Annotated Base  
780 Peak Chromatogram of the total **A)** O-glycome released from CA125 and  
781 Extracted ion chromatogram of m/z 681.32<sup>-</sup> (Neu5Gc) and 665.32<sup>-</sup> (Neu5Ac)  
782 and **B)** N-glycome released from bAGP and Extracted ion chromatogram of  
783 m/z 1127.4<sup>2-</sup> (Neu5Gc) and 1111.4<sup>2-</sup> (Neu5Ac). Confirmation of **C)** Neu5Gc  
784 (m/z 681.32<sup>-</sup>) and Neu5Ac (m/z 665.32<sup>-</sup>) containing O-glycan structures by  
785 MS/MS fragmentation and **D)** Neu5Gc (m/z 1127.4<sup>2-</sup>) and Neu5Ac (m/z  
786 1111.4<sup>2-</sup>) containing glycan structures by MS/MS fragmentation.

787

788 **Figure S3. A representative Glycoprotein Units (GPUs) standard curve.**  
789 Bovine AGP (MW = 41-43 kDa; ~50 %/50 % Neu5Ac/Neu5Gc; high total sialic  
790 acids) and human CA125 (MW = >200 kDa, 5-10 % Neu5Gc; low total sialic  
791 acid) were combined at starting concentrations of 15 µg/ml and 15 units/ml,  
792 respectively, in 0.5 % normal human serum. This glycoprotein mixture was

793 two-fold serially diluted down to 14.65 ng/ml and 0.0146515 units/ml,  
794 respectively, in 0.5 % normal human serum. The Response Units (RUs) for  
795 each concentration of the standard mixture were determined by subtracting  
796 binding due to SubB<sub>A12</sub> (flow cell 4) from binding due to SubB2M on flow cell 2  
797 and flow cell 3. RUs obtained for the highest concentration standard was  
798 considered 100 GPUs. FC2 = flow cell 2; FC3 = flow cell 3.

799

800 **Figure S4. ROC curves depicting the ability of serum Neu5Gc levels**

801 **determined by the optimized SubB2M-A<sub>12</sub>-SPR assay to distinguish**

802 **Stage I – IV ovarian cancer patients from cancer-free (normal)**

803 **individuals.** Sensitivity% (true positive rate; ability to detect disease) is

804 plotted against 100 %-specificity% (false positive rate or 100 %-true negative

805 rate; ability to detect lack of disease). ROC analyses were performed with the

806 data shown in Figure 2B using Graphpad Prism 8.0

807

808 **Figure S5. ROC curves depicting the ability of serum Neu5Gc levels to**

809 **distinguish Stage I – IV breast cancer patients from normal (cancer-free)**

810 **individuals.** Sensitivity% (true positive rate; ability to detect disease) is

811 plotted against 100 %-specificity% (false positive rate or 100 %-true negative

812 rate; ability to detect lack of disease). ROC analyses were performed with the

813 data shown in Figure 3 using Graphpad Prism 8.0

814

815 **Figure S6. Serum Neu5Gc levels determined by SubB2M-A<sub>12</sub>-SPR assay**

816 **for A) relapse cases and B) remission cases from the Circ.BR cohort.**

817 The mean GPUs from duplicate analyses for each serum sample are shown.

818 Error bars =  $\pm 1$  SD from the mean for each group. Two independent assays  
 819 were performed with both showing the same trends. Results from one assay  
 820 are shown. Clinical information for each patient is shown in the top right of  
 821 each plot with treatment history and metastases overlaid. ALND: Axillary  
 822 lymph node dissection, ILC: Invasive Lobular Carcinoma Mast: mastectomy,  
 823 SNB: sentinel node biopsy, WLE: wide local excision, XRT: radiation therapy.  
 824 Detailed information for each patient in the Circ.BR cohort are shown in  
 825 Supplementary Table 3.

826  
 827

828 **Supplementary Table 4. Optimal cut-off values, sensitivity and**  
 829 **specificity for distinguishing Stage I, II, III and IV ovarian cancer patients**  
 830 **from normal (cancer-free) individuals using serum Neu5Gc levels**  
 831 **determined by optimized SubB2M-SPR assay before and after SubB<sub>A12</sub>**  
 832 **subtraction.** Sensitivity and specificity were determined from the Receiver  
 833 operating characteristic (ROC) curves (**Figure S4**). Optimal cut-off values  
 834 were selected to give the maximum sum of sensitivity and specificity.  
 835

|                          | <b>Before SubB<sub>A12</sub></b>                           | <b>After SubB<sub>A12</sub></b>                          |
|--------------------------|------------------------------------------------------------|----------------------------------------------------------|
|                          | <b>subtraction</b>                                         | <b>subtraction</b>                                       |
| <b>Normal vs Stage I</b> | >9.02 GPU's (91.67 %<br>sensitivity, 100 %<br>specificity) | >6.90 GPU's (100 %<br>sensitivity, 100 %<br>specificity) |

|                            |                                                       |                                                    |
|----------------------------|-------------------------------------------------------|----------------------------------------------------|
| <b>Normal vs Stage II</b>  | >8.83 GPUs (90.91 % sensitivity, 94.45 % specificity) | >6.88 GPUs (100 % sensitivity, 100 % specificity)  |
| <b>Normal vs Stage III</b> | >14.50 GPUs (100 % sensitivity, 100 % specificity)    | >16.40 GPUs (100 % sensitivity, 100 % specificity) |
| <b>Normal vs Stage IV</b>  | >10.49 GPUs (100 % sensitivity, 100 % specificity)    | >11.87 GPUs (100 % sensitivity, 100 % specificity) |

836

837

838 **Supplementary Table 5. Optimal cut-off and area under the curve (AUC)**  
839 **values for distinguishing Stage I, II, III and IV breast cancer patients from**  
840 **normal (cancer-free) individuals using serum Neu5Gc levels.** Sensitivity  
841 and specificity were determined from the receiver operating characteristic  
842 (ROC) curves (**Figure S5**). Optimal cut-off values were selected to give the  
843 maximum sum of sensitivity and specificity.

844

|                            | <b>Optimal cut-off</b>                                  | <b>ROC AUC</b> |
|----------------------------|---------------------------------------------------------|----------------|
| <b>Normal vs Stage I</b>   | >10.55 GPU (sensitivity = 95.83 %, specificity = 100 %) | 0.9583         |
| <b>Normal vs Stage II</b>  | >10.49 GPU (sensitivity = 100 %, specificity = 100 %)   | 1.000          |
| <b>Normal vs Stage III</b> | >14.54 GPU (sensitivity = 100 %, specificity = 100 %)   | 1.000          |

---

**Normal vs Stage IV** >19.87GPU (sensitivity = 1.000  
100%, specificity = 100%)

---

845

846

847

848

849

850

851

852

853

**Supplementary Table S1.** Supplementary glycan microarray document based on MIRAGE guidelines DOI: 10.1093/glycob/cww118.

| Classification                                     | Guidelines                                                                                                                                                                                                                                                                                                                                  |
|----------------------------------------------------|---------------------------------------------------------------------------------------------------------------------------------------------------------------------------------------------------------------------------------------------------------------------------------------------------------------------------------------------|
| <b>1. Sample: Glycan Binding Sample</b>            |                                                                                                                                                                                                                                                                                                                                             |
| Description of Sample                              | <p><u>Sample names:</u><br/><i>Escherichia coli</i> SubB2M and SubB<sub>A12</sub>.</p> <p><u>Origin:</u> B subunit pentameric toxins produced as a recombinant protein in <i>E. coli</i>.</p> <p><u>Method of preparation:</u><br/>The preparation of SubB2M and SubB<sub>A12</sub> are explained in the Materials and Methods section.</p> |
| Sample modifications                               | SubB2M and SubB <sub>A12</sub> are hexahistidine-tagged proteins.                                                                                                                                                                                                                                                                           |
| Assay protocol                                     | Please see Materials and Methods and appended manufacture's manual.                                                                                                                                                                                                                                                                         |
| <b>2. Glycan Library</b>                           |                                                                                                                                                                                                                                                                                                                                             |
| Glycan description for defined glycans             | Arrays used are the Z-Biotech Neu5Gc/Neu5Ac N-Glycan Array. Glycans in this study are listed in Supplementary Figure S1 and are outlined below.                                                                                                                                                                                             |
| Glycan description for undefined glycans           | N/A.                                                                                                                                                                                                                                                                                                                                        |
| Glycan modifications                               | N/A                                                                                                                                                                                                                                                                                                                                         |
| <b>3. Printing Surface; e.g., Microarray Slide</b> |                                                                                                                                                                                                                                                                                                                                             |
| Description of surface                             | NHS matrix slides                                                                                                                                                                                                                                                                                                                           |
| Manufacturer                                       | Schott Nexterion                                                                                                                                                                                                                                                                                                                            |
| Custom preparation of surface                      | N/A.                                                                                                                                                                                                                                                                                                                                        |
| Non-covalent Immobilisation                        | N/A.                                                                                                                                                                                                                                                                                                                                        |
| <b>4. Arrayer (Printer)</b>                        |                                                                                                                                                                                                                                                                                                                                             |



|                                                              |                                                                                                                                                                     |
|--------------------------------------------------------------|---------------------------------------------------------------------------------------------------------------------------------------------------------------------|
| Description of Arrayer                                       | See Z-Biotech                                                                                                                                                       |
| Dispensing mechanism                                         | See Z-Biotech                                                                                                                                                       |
| Glycan deposition                                            | See Z-Biotech                                                                                                                                                       |
| Printing conditions                                          | See Z-Biotech                                                                                                                                                       |
| <b>5. Glycan Microarray with “Map”</b>                       |                                                                                                                                                                     |
| Array layout                                                 | See page 3.                                                                                                                                                         |
| Glycan identification and quality control                    | Arrays are quality controlled as described on page 6.                                                                                                               |
| <b>6. Detector and Data Processing</b>                       |                                                                                                                                                                     |
| Scanning hardware                                            | Innopsys InnoScan 1100AL (Lasers: 488 nM, 532 nM with two filter sets for analysis at 532 and 595 nM), 635 nM) scanner.                                             |
| Scanner settings                                             | Scanning resolution: 10 $\mu$ M<br>Laser channel: 532 nM operating 532 nM excitation filter set.<br>PMT: 20 % gain<br>Scan powers: Low laser power.                 |
| Image analysis software                                      | Innopsys MAPIX.                                                                                                                                                     |
| Data processing                                              | Data was exported as a CSV file and exported to Microsoft Excel.                                                                                                    |
| <b>7. Glycan Microarray Data Presentation</b>                |                                                                                                                                                                     |
| Data presentation                                            | Data is presented as histograms in Figure S1.                                                                                                                       |
| <b>8. Interpretation and Conclusion from Microarray Data</b> |                                                                                                                                                                     |
| Data interpretation                                          | We only use glycan arrays as a yes/no binding tool. Due to this we look only at binding that is unambiguously above background vs lack of binding above background. |
| Conclusions                                                  | SubB2M is specific for Neu5Gc, SubB <sub>A12</sub> does not bind to any sialic acid containing glycans.                                                             |

16-subarray Slide

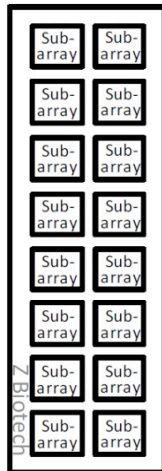

Array Map:

|       |       |       |       |       |       |       |       |       |       |       |       |       |       |       |        |
|-------|-------|-------|-------|-------|-------|-------|-------|-------|-------|-------|-------|-------|-------|-------|--------|
| GC-1  | GC-1  | GC-1  | GC-2  | GC-2  | GC-2  | GC-3  | GC-3  | GC-3  | GC-4  | GC-4  | GC-4  | GC-5  | GC-5  | GC-5  | NC1    |
| GC-6  | GC-6  | GC-6  | GC-7  | GC-7  | GC-7  | GC-8  | GC-8  | GC-8  | GC-9  | GC-9  | GC-9  | GC-10 | GC-10 | GC-10 | NC1    |
| GC-11 | GC-11 | GC-11 | GC-12 | GC-12 | GC-12 | GC-13 | GC-13 | GC-13 | GC-14 | GC-14 | GC-14 | GC-15 | GC-15 | GC-15 | NC1    |
| GC-16 | GC-16 | GC-16 | GC-17 | GC-17 | GC-17 | GC-18 | GC-18 | GC-18 | GC-19 | GC-19 | GC-19 | GC-20 | GC-20 | GC-20 | PC1    |
| GC-21 | GC-21 | GC-21 | GC-22 | GC-22 | GC-22 | GC-23 | GC-23 | GC-23 | GC-24 | GC-24 | GC-24 | GC-25 | GC-25 | GC-25 | PC1    |
| GC-26 | GC-26 | GC-26 | GC-27 | GC-27 | GC-27 | GC-28 | GC-28 | GC-28 | GC-29 | GC-29 | GC-29 | GC-30 | GC-30 | GC-30 | PC1    |
| GC-31 | GC-31 | GC-31 | GC-32 | GC-32 | GC-32 | GC-33 | GC-33 | GC-33 | GC-34 | GC-34 | GC-34 | GC-35 | GC-35 | GC-35 | PC2    |
| GC-36 | GC-36 | GC-36 | GC-37 | GC-37 | GC-37 | GC-38 | GC-38 | GC-38 | GC-39 | GC-39 | GC-39 | GC-40 | GC-40 | GC-40 | PC2    |
| AC-1  | AC-1  | AC-1  | AC-2  | AC-2  | AC-2  | AC-3  | AC-3  | AC-3  | AC-4  | AC-4  | AC-4  | AC-5  | AC-5  | AC-5  | PC2    |
| AC-6  | AC-6  | AC-6  | AC-7  | AC-7  | AC-7  | AC-8  | AC-8  | AC-8  | AC-9  | AC-9  | AC-9  | AC-10 | AC-10 | AC-10 | PC3    |
| AC-11 | AC-11 | AC-11 | AC-12 | AC-12 | AC-12 | AC-13 | AC-13 | AC-13 | AC-14 | AC-14 | AC-14 | AC-15 | AC-15 | AC-15 | PC3    |
| AC-16 | AC-16 | AC-16 | AC-17 | AC-17 | AC-17 | AC-18 | AC-18 | AC-18 | AC-19 | AC-19 | AC-19 | AC-20 | AC-20 | AC-20 | PC3    |
| AC-21 | AC-21 | AC-21 | AC-22 | AC-22 | AC-22 | AC-23 | AC-23 | AC-23 | AC-24 | AC-24 | AC-24 | AC-25 | AC-25 | AC-25 | PC4    |
| AC-26 | AC-26 | AC-26 | AC-27 | AC-27 | AC-27 | AC-28 | AC-28 | AC-28 | AC-29 | AC-29 | AC-29 | AC-30 | AC-30 | AC-30 | PC4    |
| AC-31 | AC-31 | AC-31 | AC-32 | AC-32 | AC-32 | AC-33 | AC-33 | AC-33 | AC-34 | AC-34 | AC-34 | AC-35 | AC-35 | AC-35 | PC4    |
| AC-36 | AC-36 | AC-36 | AC-37 | AC-37 | AC-37 | AC-38 | AC-38 | AC-38 | AC-39 | AC-39 | AC-39 | GC-41 | GC-41 | GC-41 | Marker |

Glycan list:

**N-Glycan Identification List:**

| <b>Gc Glycan ID</b> | <b>Neu5Gc Glycans</b> | <b>Ac Glycan ID</b> | <b>Neu5Ac Glycans</b> |
|---------------------|-----------------------|---------------------|-----------------------|
| GC-1                | N002G                 | AC-1                | N002                  |
| GC-2                | N003G                 | AC-2                | N003                  |
| GC-3                | N005G                 | AC-3                | N005                  |
| GC-4                | N012G                 | AC-4                | N012                  |
| GC-5                | N013G                 | AC-5                | N013                  |
| GC-6                | N015G                 | AC-6                | N015                  |
| GC-7                | N022G                 | AC-7                | N022                  |
| GC-8                | N023G                 | AC-8                | N023                  |
| GC-9                | N025G                 | AC-9                | N025                  |
| GC-10               | N032G                 | AC-10               | N032                  |
| GC-11               | N033G                 | AC-11               | N033                  |
| GC-12               | N042G                 | AC-12               | N042                  |
| GC-13               | N043G                 | AC-13               | N043                  |
| GC-14               | N045G                 | AC-14               | N045                  |
| GC-15               | N052G                 | AC-15               | N052                  |
| GC-16               | N053G                 | AC-16               | N053                  |
| GC-17               | N055G                 | AC-17               | N055                  |
| GC-18               | N112G                 | AC-18               | N112                  |
| GC-19               | N113G                 | AC-19               | N113                  |
| GC-20               | N115G                 | AC-20               | N115                  |
| GC-21               | N122G                 | AC-21               | N122                  |
| GC-22               | N123G                 | AC-22               | N123                  |
| GC-23               | N125G                 | AC-23               | N125                  |
| GC-24               | N133G                 | AC-24               | N133                  |
| GC-25               | N134G                 | AC-25               | N134                  |
| GC-26               | N135G                 | AC-26               | N135                  |
| GC-27               | N144G                 | AC-27               | N144                  |
| GC-28               | N145G                 |                     |                       |
| GC-29               | N155G                 | AC-29               | N155                  |
| GC-30               | N212G                 | AC-30               | N212                  |
| GC-31               | N213G                 | AC-31               | N213                  |
| GC-32               | N215G                 | AC-32               | N215                  |
| GC-33               | N222G                 | AC-33               | N222                  |
| GC-34               | N223G                 | AC-34               | N223                  |
| GC-35               | N225G                 | AC-35               | N225                  |
| GC-36               | N233G                 | AC-36               | N233                  |
| GC-37               | N235G                 |                     |                       |
| GC-38               | N245G                 |                     |                       |
| GC-39               | N255G                 | AC-39               | N255                  |
| GC-40               | N003G1                |                     |                       |
| GC-41               | N003G2                |                     |                       |

# Neu5Gc and Neu5Ac N-Glycans

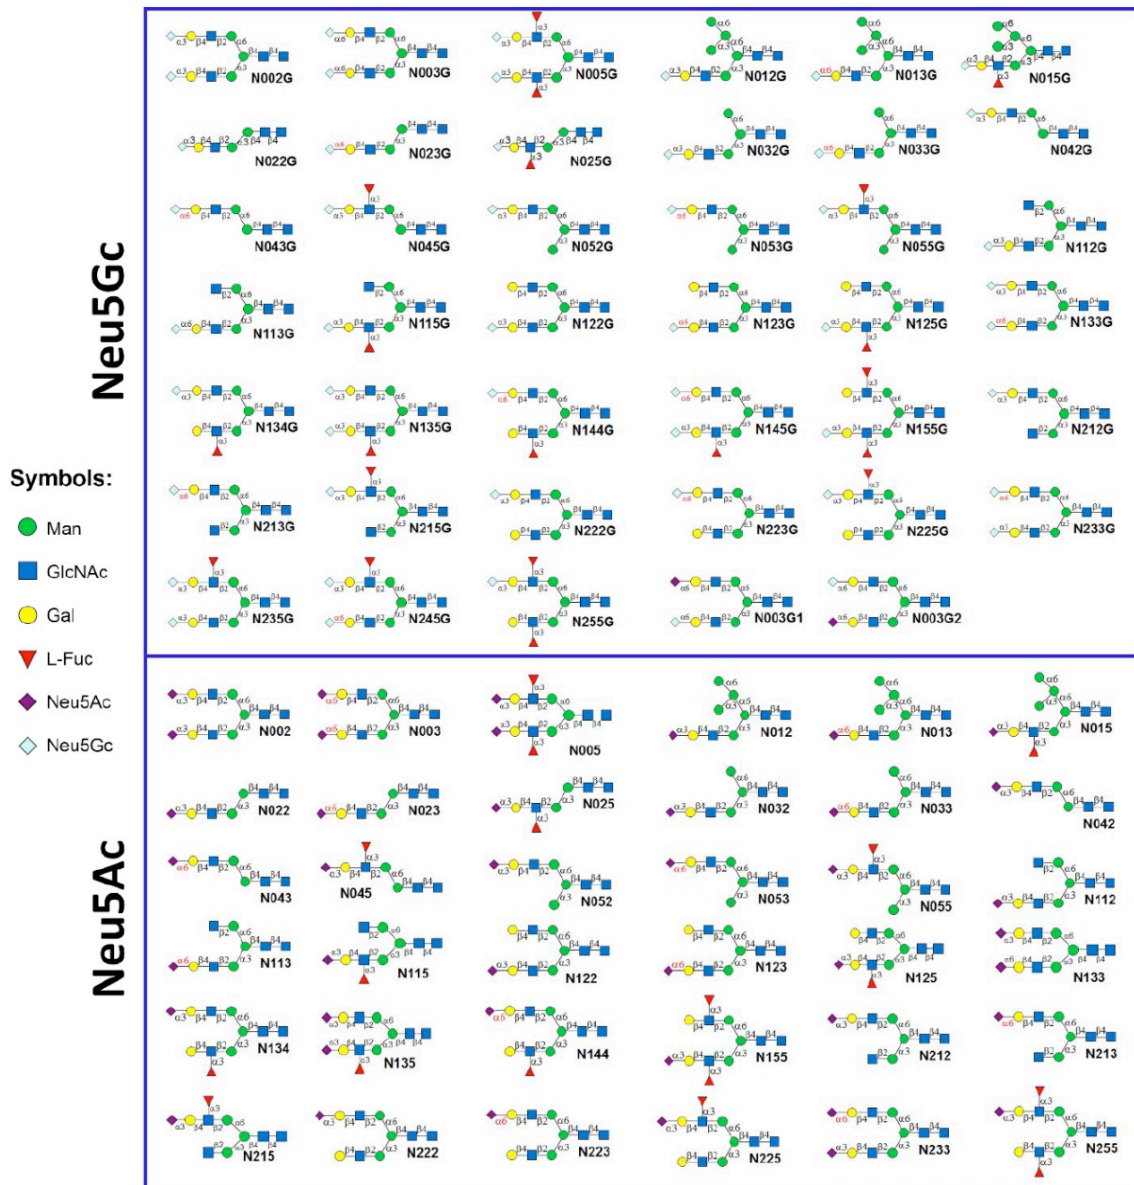

QC

Example 1: Neu5Gc/Neu5Ac array on 8 subarray format. A subarray assayed with a biotinylated SNA target (20  $\mu\text{g/ml}$ ), followed by streptavidin-Cy3 (1  $\mu\text{g/ml}$ ). The array was scanned with GenePix scanner at 500 PMT and 100% laser power at 532 nm wavelength. The positive control shows binding as expected. N-glycans containing  $\alpha$ -2,6 Neu5Gc and  $\alpha$ -2,6 Neu5Ac show binding as expected. Analysis of the fluorescence intensity reveals that Neu5Gc-sialylated glycans bind more strongly.

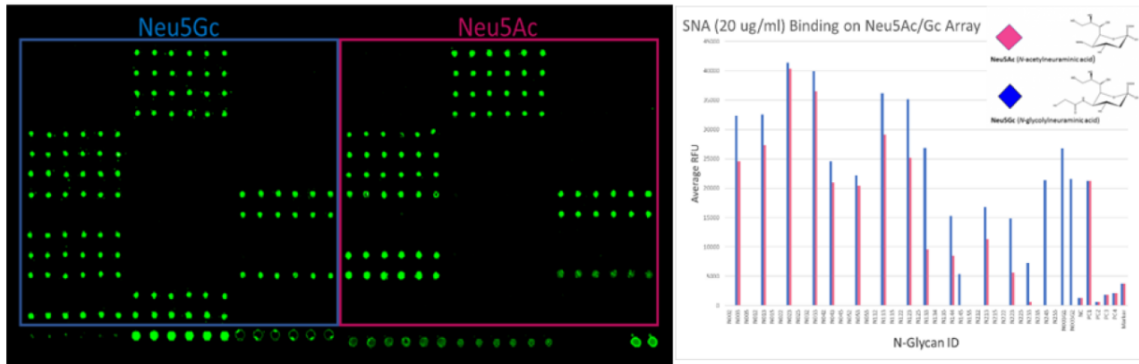

Example 2: Neu5Gc/Neu5Ac array on 8 subarray format. A subarray assayed with a biotinylated WGA target (10  $\mu\text{g/ml}$ ), followed by streptavidin-Cy3 (1  $\mu\text{g/ml}$ ). The array was scanned with GenePix scanner at 450 PMT and 100% laser power at 532 nm wavelength. The positive control shows binding as expected. Most N-glycans show binding as expected. Analysis of the fluorescence intensity reveals that Neu5Ac-sialylated glycans bind more strongly.

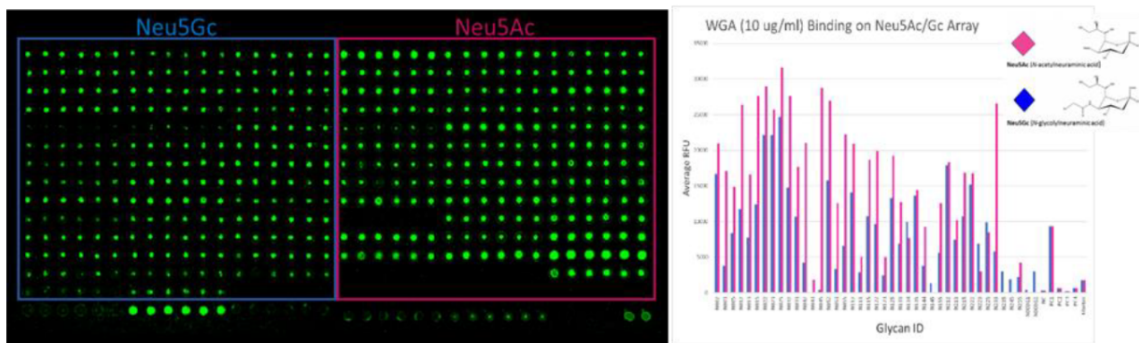

**Supplementary Table S2. Details for each of the normal (cancer-free) individuals and breast cancer patients used in this study.** Patient details were provided by the Victorian Cancer Biobank with informed written consent from each subject. Abbreviations: ALND: axillary lymph node dissection; DCIS: ductal carcinoma in-situ; G1: Grade 1; G2: Grade 2; G3: Grade 3; LCIS: lobular carcinoma in-situ; LVSI: lymph vascular space invasion; NST: no special type. Information on vital status and/or recurrence was not available from the VCB for all patients.

| Specimen no. | Age | Breast cancer stage | Type of breast cancer           | Vital status | Date of death | Survival time (years)* | Recurrence | Neu5Gc levels (GPU) |
|--------------|-----|---------------------|---------------------------------|--------------|---------------|------------------------|------------|---------------------|
| 07AH130      | 50  | N/A                 | Cancer-free                     |              |               |                        |            | 6.083               |
| 08AH714      | 42  | N/A                 | Cancer-free                     |              |               |                        |            | 6.326               |
| 09AH320      | 47  | N/A                 | Cancer-free                     |              |               |                        |            | 4.972               |
| 09AH434      | 42  | N/A                 | Cancer-free                     |              |               |                        |            | 4.278               |
| 09AH794      | 57  | N/A                 | Cancer-free                     |              |               |                        |            | 10.077              |
| 09AH796      | 52  | N/A                 | Cancer-free                     |              |               |                        |            | 8.653               |
| 09AH820      | 38  | N/A                 | Cancer-free                     |              |               |                        |            | 5.076               |
| 12EH0028     | 53  | N/A                 | Cancer-free                     |              |               |                        |            | 4.694               |
| 12EH0114     | 72  | N/A                 | Cancer-free                     |              |               |                        |            | 5.563               |
| 15EH0238     | 51  | N/A                 | Cancer-free                     |              |               |                        |            | 7.785               |
| 15EH0234     | 79  | N/A                 | Cancer-free                     |              |               |                        |            | 7.125               |
| 15EH0228     | 62  | N/A                 | Cancer-free                     |              |               |                        |            | 6.257               |
| 16EH0287     | 61  | N/A                 | Cancer-free                     |              |               |                        |            | 2.472               |
| 16EH0217     | 76  | N/A                 | Cancer-free                     |              |               |                        |            | 5.806               |
| 16EH0396     | 74  | N/A                 | Cancer-free                     |              |               |                        |            | 3.965               |
| 16EH0397     | 50  | N/A                 | Cancer-free                     |              |               |                        |            | 0.423               |
| 17EH0084     | 54  | N/A                 | Cancer-free                     |              |               |                        |            | 4.556               |
| 17EH0260     | 46  | N/A                 | Cancer-free                     |              |               |                        |            | 7.299               |
| 17EH0268     | 63  | N/A                 | Cancer-free                     |              |               |                        |            | 5.528               |
| 17EH0314     | 46  | N/A                 | Cancer-free                     |              |               |                        |            | 3.792               |
| 17EH0349     | 93  | N/A                 | Cancer-free                     |              |               |                        |            | 3.792               |
| 17EH0211     | 52  | N/A                 | Cancer-free                     |              |               |                        |            | 4.937               |
| 02PM1046     | 80  | I                   | Invasive lobular carcinoma (G2) |              |               |                        |            | 20.702              |

|          |    |   |                                                                                       |   |     |  |  |        |
|----------|----|---|---------------------------------------------------------------------------------------|---|-----|--|--|--------|
| 04PM1332 | 55 | I | Invasive ductal carcinoma (G2) with associated DCIS (high grade)                      | A | N/A |  |  | 37.856 |
| 09PM0065 | 53 | I | Invasive ductal carcinoma (G3) with associated DCIS (high grade)                      | A | N/A |  |  | 24.904 |
| 15PM0686 | 38 | I | Invasive ductal carcinoma (G2) with associated DCIS (high grade)                      | A | N/A |  |  | 11.014 |
| 15PM0997 | 59 | I | Invasive mixed micropapillary and ductal/NST carcinoma (G3) and DCIS (high grade)     |   |     |  |  | 24.349 |
| 11MH0317 | 43 | I | Invasive ductal carcinoma NST (G3)                                                    | A | N/A |  |  | 25.460 |
| 12MH0314 | 44 | I | Invasive ductal carcinoma NST (G2) with associated DCIS (high grade)                  | A | N/A |  |  | 25.251 |
| 11MH0052 | 68 | I | Invasive ductal carcinoma (G2) with associated DCIS (low grade)                       |   |     |  |  | 16.188 |
| 11MH0554 | 61 | I | Invasive ductal carcinoma NST (G2) with associated DCIS (high grade)                  | A | N/A |  |  | 22.508 |
| 13MH1003 | 66 | I | Invasive ductal carcinoma (G1) with associated DCIS (low grade)                       |   |     |  |  | 17.299 |
| 10RMH737 | 58 | I | Invasive ductal carcinoma NST (G2) with associated DCIS (high grade)                  |   |     |  |  | 14.799 |
| 11MH0567 | 47 | I | Invasive ductal carcinoma with lobular features (G2) with associated DCIS (low grade) |   |     |  |  | 12.369 |
| 09RMH083 | 60 | I | Invasive ductal carcinoma NST (G2) with extensive DCIS (high grade)                   |   |     |  |  | 35.634 |
| 10RMH281 | 54 | I | Invasive ductal carcinoma NST (G3)                                                    | A | N/A |  |  | 22.717 |
| 10RMH383 | 77 | I | Invasive mucinous adenocarcinoma (G2)                                                 |   |     |  |  | 30.391 |
| 10RMH514 | 81 | I | Invasive lobular carcinoma NST (G2) with associated LCIS                              | A | N/A |  |  | 35.947 |
| 12MH0215 | 35 | I | Invasive ductal carcinoma NST (G2)                                                    |   |     |  |  | 14.869 |
| 12MH0481 | 56 | I | Invasive ductal carcinoma NST (G2) with associated DCIS (high grade)                  |   |     |  |  | 23.133 |
| 12MH1013 | 65 | I | Invasive ductal adenocarcinoma NST (G1) with DCIS (low grade)                         | A | N/A |  |  | -3.674 |
| 12MH1291 | 56 | I | Invasive ductal adenocarcinoma NST (G2)                                               | A | N/A |  |  | 26.849 |

|          |    |    |                                                                                                                                |   |            |      |  |        |
|----------|----|----|--------------------------------------------------------------------------------------------------------------------------------|---|------------|------|--|--------|
| 13MH1223 | 57 | I  | Invasive ductal carcinoma NST (G2) with DCIS (intermediate grade)                                                              |   |            |      |  | 24.210 |
| 14MH0232 | 51 | I  | Invasive ductal carcinoma NST (G1)                                                                                             | A | N/A        |      |  | 22.091 |
| 14MH0240 | 43 | I  | Invasive ductal carcinoma NST (G1) with LCIS (moderate)                                                                        | A | N/A        |      |  | 28.446 |
| 16MH1550 | 48 | I  | Lobular carcinoma NST (G3) with associated LCIS                                                                                | A | N/A        |      |  | 20.772 |
| 02PM0520 | 58 | II | Invasive ductal carcinoma NST (G3) with associated DCIS (high grade) & metastatic adenocarcinoma                               | A | N/A        |      |  | 23.967 |
| 04PM0880 | 45 | II | Invasive ductal carcinoma (G3) with associated DCIS (minor high grade) & metastatic carcinoma                                  | A | N/A        |      |  | 17.543 |
| 05PM1100 | 31 | II | Mixed invasive ductal carcinoma (NTS and mucinous) (G2) with associated DCIS (high grade) & metastatic tumor of sentinel nodes | A | N/A        |      |  | 11.605 |
| 05PM1168 | 55 | II | Invasive ductal carcinoma (G3) with associated DCIS (high grade) & metastatic carcinoma                                        | D | 30/05/2008 | 3    |  | 13.410 |
| 06PM0542 | 26 | II | Invasive mucinous carcinoma (G1 & G2) with associated DCIS (high grade)                                                        |   |            |      |  | 11.257 |
| 08PM1308 | 59 | II | Invasive ductal carcinoma NST (G3) & metastatic carcinoma                                                                      | A | N/A        |      |  | 17.786 |
| 08PM1949 | 49 | II | Invasive lobular carcinoma (G2) (post chemotherapy) & metastatic carcinoma                                                     | A | N/A        |      |  | 15.772 |
| 15PM0781 | 44 | II | Invasive ductal carcinoma NST (G3) & metastatic carcinoma                                                                      | A | N/A        |      |  | 10.910 |
| 14PM0388 | 67 | II | Invasive ductal carcinoma NST (G3) with associated DCIS (high grade)                                                           |   |            |      |  | 12.542 |
| 15PM1021 | 53 | II | Invasive ductal carcinoma NST (G2) with associated DCIS (intermediate to high grade)                                           | A | N/A        |      |  | 10.945 |
| 15PM1119 | 51 | II | Mixed invasive carcinoma (micropapillary and NST) (G3) with associated DCIS (low and high grade) & metastatic carcinoma        | A | N/A        |      |  | 18.619 |
| 13MH0429 | 51 | II | Invasive ductal carcinoma (G2) with associated DCIS (intermediate grade) & metastatic carcinoma                                | D | 26/04/2017 | 4.08 |  | 13.063 |
| 16MH1592 | 47 | II | Invasive ductal carcinoma NST (G3) with minor DCIS                                                                             | A | N/A        |      |  | 28.585 |



|          |    |     |                                                                                                                                             |   |            |      |     |        |
|----------|----|-----|---------------------------------------------------------------------------------------------------------------------------------------------|---|------------|------|-----|--------|
| 01PM0361 | 75 | II  | Invasive ductal carcinoma NST (G3) with DCIS (high grade)                                                                                   | D | 03/01/2003 | 1.33 |     | 20.286 |
| 01PM0632 | 71 | II  | Invasive ductal carcinoma NST (G3)                                                                                                          | D | 06/06/2003 | 1.75 | No  | 23.411 |
| 03PM0734 | 47 | II  | Invasive ductal carcinoma NST (G2) & metastatic carcinoma                                                                                   |   |            |      |     | 22.091 |
| 05PM2377 | 49 | II  | Invasive ductal carcinoma NST (G1) with DCIS (low grade)                                                                                    | A | N/A        |      | Yes | 30.738 |
| 08PM1773 | 79 | II  | Invasive ductal carcinoma NST (G3) with DCIS (high grade)                                                                                   |   |            |      |     | 20.598 |
| 08PM1785 | 54 | II  | Invasive ductal carcinoma NST (G3) with DCIS (high grade) & metastatic carcinoma                                                            | A | N/A        |      |     | 20.771 |
| 09PM0040 | 51 | II  | Invasive ductal carcinoma NST (G1) with DCIS (high grade)                                                                                   | A | N/A        |      | Yes | 16.154 |
| 10PM0659 | 31 | II  | Invasive ductal carcinoma (G2) with neuroendocrine differentiation                                                                          |   |            |      |     | 27.092 |
| 10PM2156 | 78 | II  | Invasive ductal carcinoma NST (G3) with DCIS (high grade)                                                                                   | D | 18/03/2017 | 6.33 | No  | 17.022 |
| 12PM0321 | 46 | II  | Invasive ductal carcinoma NST (G1) with DCIS (low to intermediate grade) & metastatic carcinoma                                             | A | N/A        |      |     | 15.945 |
| 13PM0443 | 39 | II  | Invasive ductal (NST) (G3) and lobular carcinoma with DCIS (intermediate to high grade)                                                     | D | 20/02/2015 | 1.83 | Yes | 16.223 |
| 01PM0503 | 49 | III | Invasive ductal carcinoma (G3) with associated DCIS (high grade) of right breast                                                            | D | 09/03/2002 | 0.42 |     | 65.254 |
| 03PM0187 | 57 | III | Invasive ductal carcinoma NTS (G3) with associated DCIS (high grade) of left breast with invasion of skeletal muscle and lymphatic channels |   |            |      |     | 30.530 |
| 03PM1038 | 32 | III | Invasive ductal carcinoma (G3) with associated DCIS (high grade) of right breast & metastatic carcinoma                                     | D | 18/12/2004 | 1.42 |     | 31.016 |
| 04PM0931 | 51 | III | Invasive ductal carcinoma NST (G3) with possible DCIS of right breast & metastatic carcinoma, advanced left breast cancer                   | D | 06/01/2005 | 3    |     | 55.879 |
| 08PM1472 | 57 | III | Invasive ductal carcinoma (G3) with associated DCIS (high grade) of right breast & metastatic carcinoma                                     |   |            |      |     | 28.967 |
| 09PM1880 | 55 | III | Invasive ductal carcinoma (G3) (basal type differentiation) with associated DCIS (high grade) of                                            | A | N/A        |      |     | 41.572 |

|                 |    |     |                                                                                                              |   |            |      |     |        |
|-----------------|----|-----|--------------------------------------------------------------------------------------------------------------|---|------------|------|-----|--------|
|                 |    |     | left breast & metastatic carcinoma                                                                           |   |            |      |     |        |
| 11PM0575        | 33 | III | Invasive mucinous carcinoma (G1) of left breast & metastatic carcinoma                                       | A | N/A        |      |     | 33.724 |
| 11PM1136        | 42 | III | Invasive ductal carcinoma (G3) with associated DCIS (high grade) of right breast & metastatic carcinoma      | D | 31/08/2013 | 2.17 |     | 37.683 |
| 14PM1036        | 83 | III | Invasive ductal carcinoma NST (G3) with associated DCIS (high grade) of right breast & metastatic carcinoma  | A | N/A        |      |     | 32.856 |
| 15PM0518        | 53 | III | Invasive ductal adenocarcinoma (G3) with associated LCIS (high grade) of left breast & metastatic carcinoma  | A | N/A        |      |     | 52.059 |
| 15PM0965        | 56 | III | Invasive carcinoma (basal) (G3) with associated DCIS (high grade) of left breast & metastatic carcinoma      | A | N/A        |      |     | 73.658 |
| 11MH0137        | 43 | III | Invasive ductal carcinoma NST (G3) with associated DCIS (high grade) of right breast & metastatic carcinoma  | A | N/A        |      |     | 30.078 |
| 09RMH727        | 45 | III | Poorly differentiated invasive ductal carcinoma (G3) & metastatic carcinoma                                  | A | N/A        |      |     | 53.378 |
| 10RMH275        | 69 | III | Invasive ductal carcinoma NTS (G1) with DCIS (intermediate to high grade) & metastatic carcinoma             |   |            |      |     | 42.857 |
| 12MH0211        | 48 | III | Invasive ductal carcinoma (G2) with metastatic ductal carcinoma                                              | A | N/A        |      |     | 41.259 |
| 12MH0483        | 56 | III | Micropapillary invasive ductal carcinoma (G3)                                                                | A | N/A        |      | Yes | 44.142 |
| 13MH0077        | 56 | III | Invasive lobular carcinoma (G1) & metastatic lobular carcinoma                                               | A | N/A        |      |     | 53.031 |
| 18MH0981        | 36 | III | Invasive ductal carcinoma NTS (G3) with DCIS (low and high grade)                                            | A | N/A        |      |     | 26.363 |
| 01PM0213<br>BLD | 66 | III | Invasive ductal carcinoma (moderately differentiated) (G2/3) with DICS (intermediate) & metastatic carcinoma |   |            |      |     | 31.120 |
| 01PM0463        | 81 | III | Invasive ductal carcinoma (G2) & metastatic carcinoma                                                        | D | 12/09/2003 | 2    | Yes | 38.968 |
| 01PM0443        | 76 | III | Invasive ductal carcinoma (G3) with some lobular pattern & metastatic carcinoma                              | D | 20/11/2002 | 1.17 |     | 19.001 |

|                 |    |     |                                                                                                                                                                                                                          |   |            |      |     |         |
|-----------------|----|-----|--------------------------------------------------------------------------------------------------------------------------------------------------------------------------------------------------------------------------|---|------------|------|-----|---------|
| 02PM1143        | 39 | III | Invasive ductal carcinoma (G2) with associated DCIS (high grade) & metastatic carcinoma                                                                                                                                  | D | 05/01/2011 | 8.08 |     | 26.883  |
| 03PM0227<br>BLD | 57 | III | Invasive ductal carcinoma NTS (G3) with DCIS (high grade)                                                                                                                                                                |   |            |      |     | 40.808  |
| 08PM2010<br>BLD | 50 | III | Invasive ductal carcinoma (G3)                                                                                                                                                                                           | A | N/A        |      | Yes | 27.890  |
| 17MH0909bl      | 49 | IV  | Invasive ductal carcinoma (G3) with associated DCIS (high grade) of left breast with foci of LVSI & metastatic carcinoma                                                                                                 | D | 06/05/2018 | 0.83 |     | 181.200 |
| 17MH0907bl      | 76 | IV  | Metastatic breast carcinoma (stable stage IV for 7 years, primary lung cancer)                                                                                                                                           |   |            |      |     | 203.389 |
| 15MH1848bl      | 54 | IV  | Metastatic adenoid cystic carcinoma of right breast (G3) (also adenoid cystic carcinoma of brain consistent with primary breast cancer)                                                                                  |   |            |      |     | 134.566 |
| 15MH1826bl      | 45 | IV  | Invasive adenocarcinoma NST (right breast, G3; left breast, G2) with associated DCIS (high grade) & metastatic carcinoma (clavicular head; 6/7 right lymph nodes; 7/7 left lymph nodes), history of Non-Hodgkin lymphoma | A | N/A        |      |     | 138.211 |
| 15MH1733bl      | 27 | IV  | Invasive ductal carcinoma (G3) with associated DCIS (high grade) of left breast & metastatic carcinoma (4/5 sentinel nodes; 10/11 lymph nodes with extravascular spread)                                                 | A | N/A        |      |     | 92.548  |
| 13MH1140bl      | 62 | IV  | Invasive lobular carcinoma of left breast (G2); Invasive lobular carcinoma (G2) and invasive ductal carcinoma NST (G3) of right breast & metastatic carcinoma (3/18 right axillary lymph nodes)                          | A | N/A        |      |     | 74.595  |
| 13MH0914bl      | 42 | IV  | Invasive ductal carcinoma (G3) of left breast; recurrent disease; metastasis to the vertebrae                                                                                                                            | D | 07/12/2013 | 0.25 | Yes | 59.108  |
| 13MH0767bl      | 48 | IV  | Invasive ductal carcinoma (G2) of left breast & metastatic carcinoma (bone metastasis; 1/1 lymph nodes)                                                                                                                  | D | 03/02/2016 | 2.5  |     | 62.962  |
| 13MH0529bl      | 62 | IV  | Invasive ductal adenocarcinoma (G3) of right breast & metastatic carcinoma (pulmonary metastasis, 2/5 lymph nodes)                                                                                                       | D | 02/03/2016 | 2.75 |     | 50.774  |

|            |    |    |                                                                                                                                                                 |   |            |      |  |         |
|------------|----|----|-----------------------------------------------------------------------------------------------------------------------------------------------------------------|---|------------|------|--|---------|
| 13MH0217bl | 61 | IV | Invasive ductal adenocarcinoma (G3) of right breast & metastatic adenocarcinoma (9/12 lymph nodes with extravascular extension; bone metastasis)                | A | N/A        |      |  | 36.572  |
| 12MH1318   | 41 | IV | Invasive ductal carcinoma (G2) of left breast with associated DCIS (high grade) & metastatic carcinoma (1/13 lymph nodes; pulmonary metastasis)                 | A | N/A        |      |  | 67.650  |
| 12MH0226   | 66 | IV | Invasive ductal carcinoma (G3) of right breast & metastatic carcinoma (19/21 lymph nodes; pulmonary metastasis)                                                 | D | 12/12/2016 | 3.75 |  | 55.635  |
| 02PM0246   | 73 | IV | Longstanding metastatic breast carcinoma (bone, pulmonary and adrenal metastasis)                                                                               |   |            |      |  | 176.060 |
| 02PM0320   | 64 | IV | Invasive primary breast adenocarcinoma (uterus, ovary, fallopian tube and omentum metastasis)                                                                   |   |            |      |  | 130.884 |
| 05PM1349   | 48 | IV | Invasive lobular carcinoma (G2) with minor mucinous component & DCIS (intermediate and high grade) of left breast                                               | D | 28/09/2005 | 0.25 |  | 126.856 |
| 06PM0159   | 54 | IV | Primary breast carcinoma & metastatic carcinoma (oesophagus)                                                                                                    | D | 26/12/2006 | 0.83 |  | 88.416  |
| 08PM1819   | 57 | IV | Invasive ductal carcinoma of breast (metastasis to left shoulder/chest wall)                                                                                    |   |            |      |  | 77.338  |
| 08PM1958   | 47 | IV | Metastatic primary breast carcinoma (left femoral head)                                                                                                         |   |            |      |  | 39.002  |
| 10PM1401   | 60 | IV | Metastatic primary breast adenocarcinoma (metastasis to brain and spine)                                                                                        |   |            |      |  | 62.476  |
| 11PM0548   | 51 | IV | Metastatic primary breast carcinoma (metastasis to brain)                                                                                                       |   |            |      |  | 46.607  |
| 11PM1336   | 39 | IV | Metastatic breast carcinoma (adenocarcinoma of ovary and fallopian tubes)                                                                                       | A | N/A        |      |  | 29.661  |
| 11PM1339   | 39 | IV | Invasive ductal carcinoma NST (G3) with associated DCIS (intermediate to high grade) of both breasts & metastatic breast adenocarcinoma (metastasis to ovaries) | D | 29/06/2014 | 2.83 |  | 53.760  |
| 13PM0154   | 72 | IV | Metastatic lobular carcinoma (15/18 lymph nodes of left axillary; 10/36 lymph nodes of neck)                                                                    | A | N/A        |      |  | 35.877  |

|          |    |    |                                                    |   |     |  |     |        |
|----------|----|----|----------------------------------------------------|---|-----|--|-----|--------|
| 13PM0931 | 73 | IV | Metastatic mucinous carcinoma (metastasis to lung) | A | N/A |  | Yes | 30.148 |
|----------|----|----|----------------------------------------------------|---|-----|--|-----|--------|

\*From date serum sample was taken to date of death

**Supplementary Table S3. Details for each of the breast cancer patients from the Circ.BR cohort used in this study.** Patient details were provided by the Brisbane Breast Bank with written informed consent from all patients.

| Specimen no. | Age | Breast cancer stage | Type of breast cancer                                      | Vital status | Date of death | Survival time (years)* | Recurrence |
|--------------|-----|---------------------|------------------------------------------------------------|--------------|---------------|------------------------|------------|
| 10-14-183    | 51  | T3N3a               | Invasive ductal carcinoma with micropapillary carcinoma    | D            | 25/10/2016    | 2.2                    | Yes        |
| 10-13-139    | 74  | N/A                 | Inflammatory breast cancer                                 | D            | 22/04/2015    | 4.3                    | Yes        |
| 10-14-093    | 56  | T2N3a               | Invasive ductal carcinoma                                  | D            | 05/08/2016    | 2.3                    | Yes        |
| 10-14-193    | 72  | T3N2a               | Invasive ductal carcinoma                                  | D            | 04/01/2018    | 3.4                    | Yes        |
| 10-14-162    | 51  | T2N3a               | Invasive ductal carcinoma                                  | D            | 17/11/2015    | 1.3                    | Yes        |
| 10-14-092    | 62  | T3Nx                | Invasive ductal carcinoma                                  | D            | 07/12/2015    | 1.6                    | Yes        |
| 10-14-131    | 43  | T3N3a               | Invasive lobular carcinoma                                 | A            | N/A           |                        | Yes        |
| 10-14-062    | 50  | T2N3a               | Mixed invasive ductal carcinoma/micropapillary             | A            | N/A           |                        | Yes        |
| 10-16-028    | 69  | T2N1                | Mixed invasive ductal carcinoma/invasive lobular carcinoma | A            | N/A           |                        | Yes        |
| 10-14-017    | 45  | T3N2                | Invasive ductal carcinoma                                  | A            | N/A           |                        | No         |
| 10-14-142    | 58  | T3N1a               | Invasive ductal carcinoma                                  | A            | N/A           |                        | No         |
| 10-13-204    | 39  | T3N1MX              | Invasive ductal carcinoma                                  | A            | N/A           |                        | No         |
| 10-13-186    | 53  | T1N1c               | Invasive ductal carcinoma                                  | A            | N/A           |                        | No         |
| 10-13-157    | 36  | T3N1miM0            | Invasive ductal carcinoma                                  | A            | N/A           |                        | No         |
| 10-14-122    | 37  | T2N1a               | Mixed metaplastic                                          | A            | N/A           |                        | No         |

\*Time to death from date of diagnosis

**Figure S1**

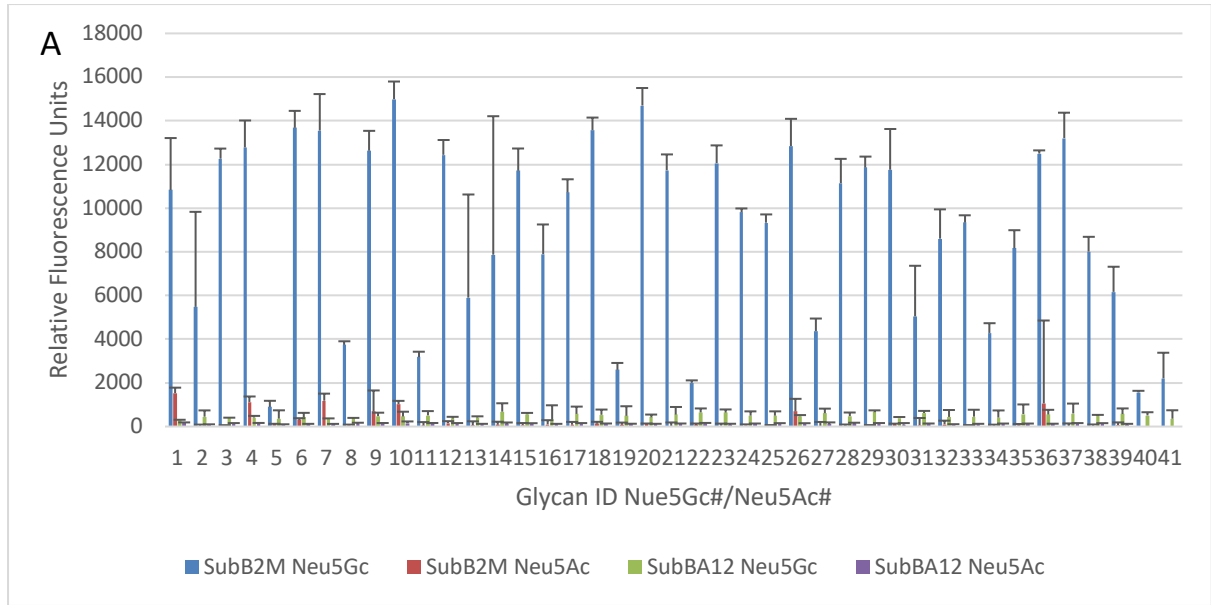

**B Neu5Gc and Neu5Ac N-Glycans**

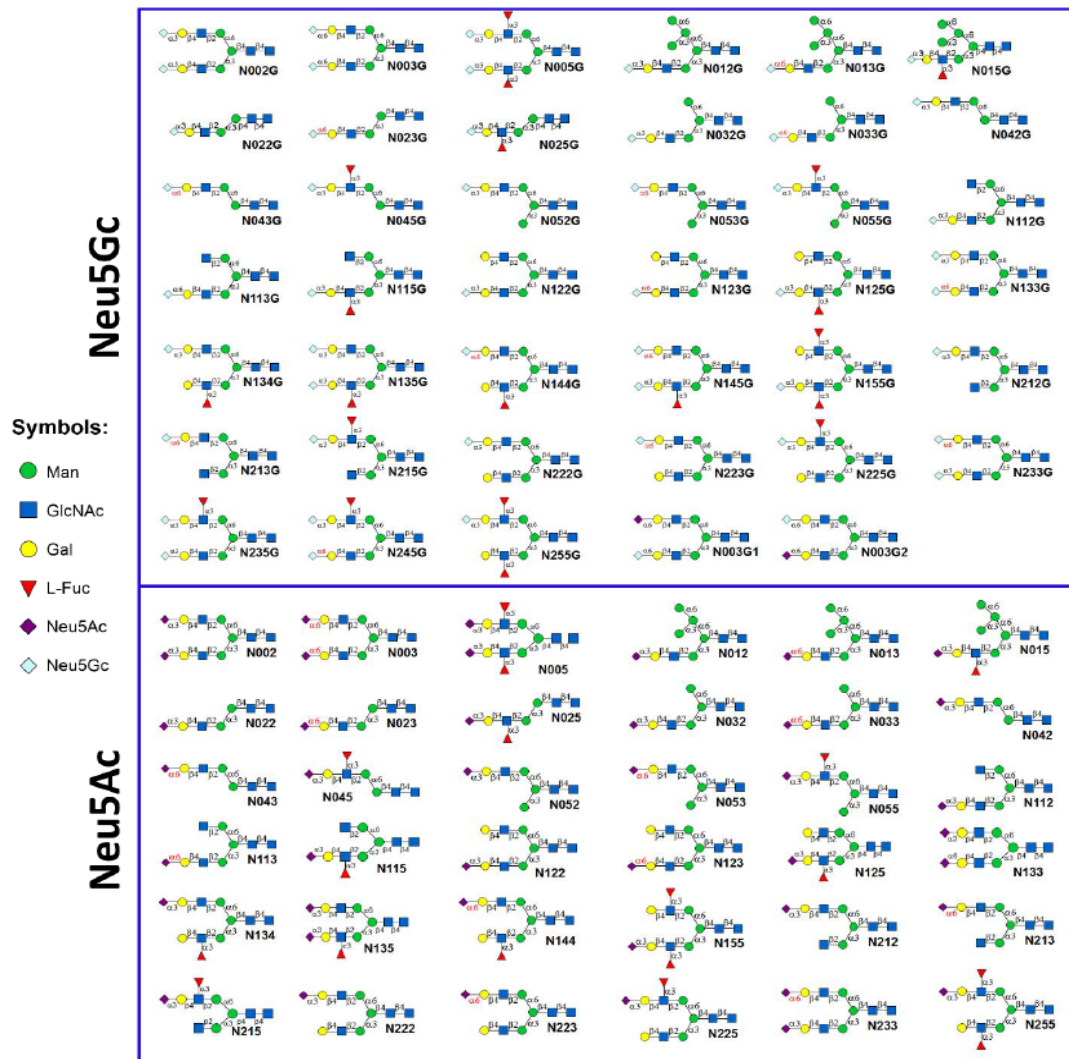

# Figure S2

A

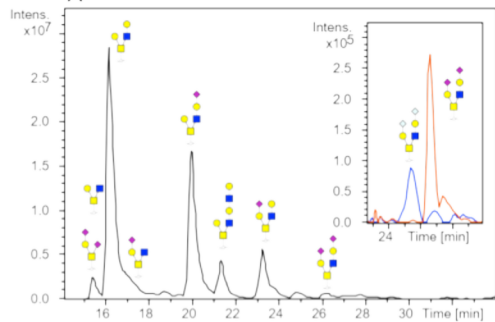

B

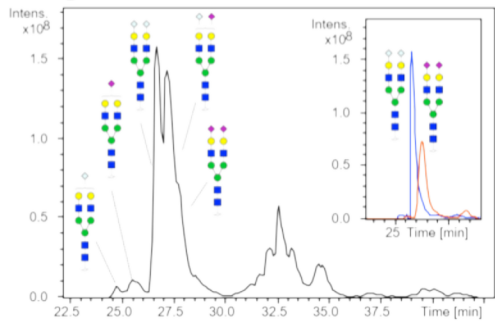

C

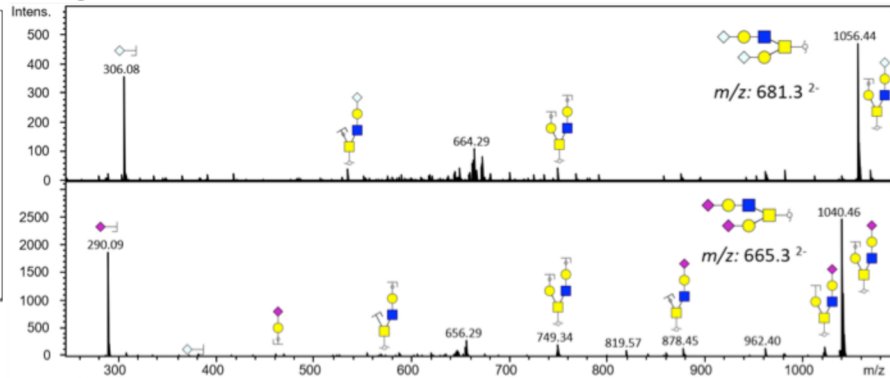

D

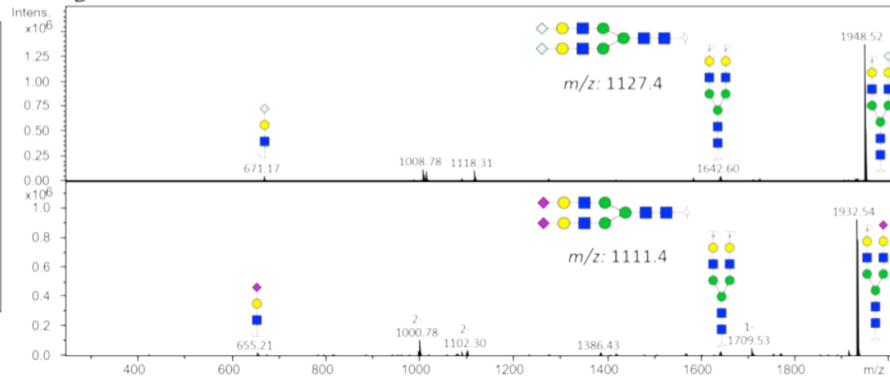



Figure S3

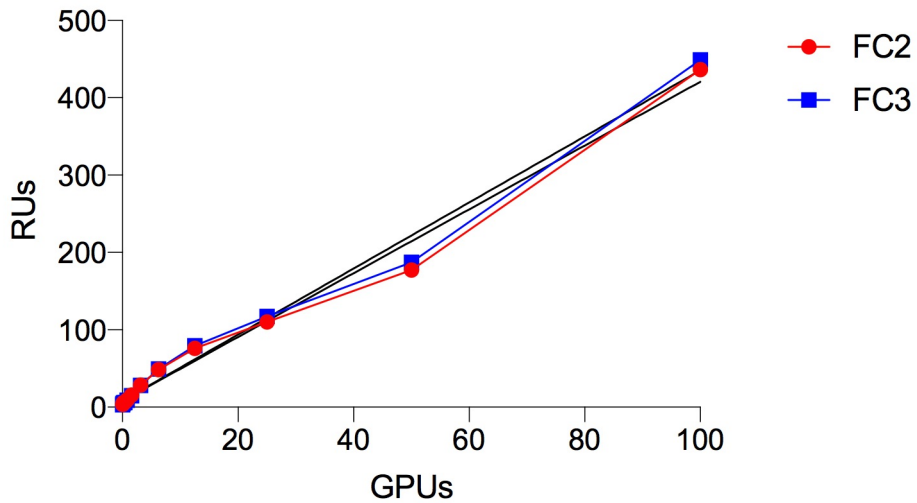

# Figure S4

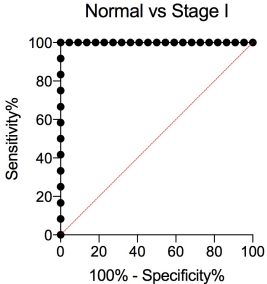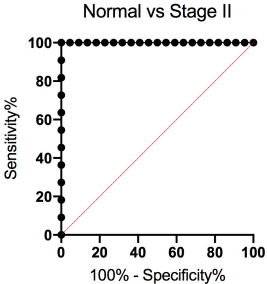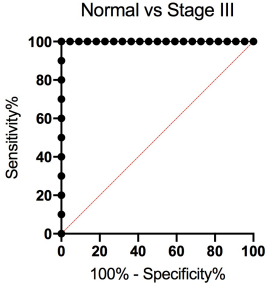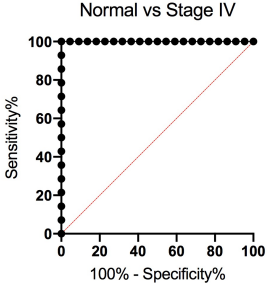

Figure S5

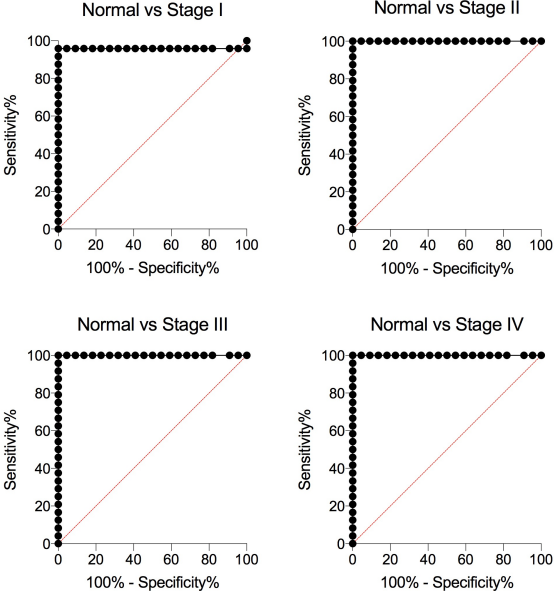

# Figure S6A

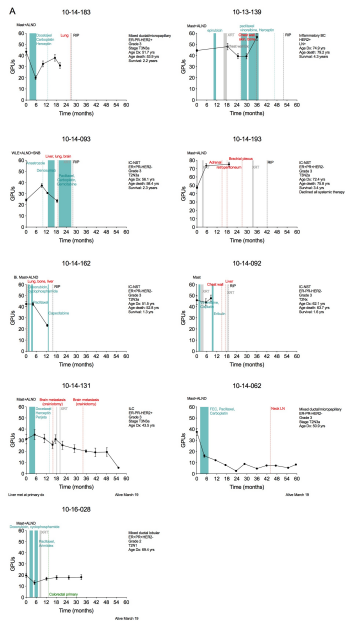

# Figure S6B

B

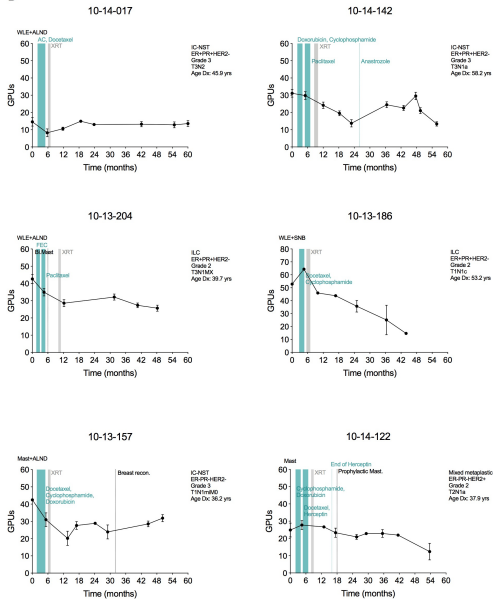

Supplement: Supplementary file [file media-1.pdf]
